# Supplementary material for: Structural and biochemical studies of the glucuronoyl esterase OtCE15A illuminate its interaction with lignocellulosic components
Source: PubMed Central journal article supplement (PMC6937553; doi:10.1074/jbc.ra119.011435), 2019-11-18
Supplement: supp_RA119.011435_156397_2_supp_426884_q0r09l.pdf [file supp_RA119.011435_156397_2_supp_426884_q0r09l.pdf]

**Table S1:** Kinetic parameters of *Ot*CE15A on model substrates as previously reported (1). The model substrates utilized were benzyl D-glucuronate (BnzGlcA), allyl D-glucuronate (AllylGlcA), methyl D-glucuronate (MeGlcA), methyl D-galacturonate (MeGalA), and *para*-nitrophenol acetate (*p*NP-Ac).

| Substrate      | $K_m$ (mM)                      | $k_{cat}$ (s <sup>-1</sup> ) | $k_{cat}/K_m$ (s <sup>-1</sup> M <sup>-1</sup> ) |
|----------------|---------------------------------|------------------------------|--------------------------------------------------|
| BnzGlcA        | 4.18 ± 0.14                     | 19.4 ± 0.19                  | (4.64 ± 0.16) x 10 <sup>3</sup>                  |
| AllylGlcA      | 2.87 ± 0.10                     | 25.2 ± 0.22                  | (8.80 ± 0.31) x 10 <sup>3</sup>                  |
| MeGlcA         | 2.77 ± 0.15                     | 19.0 ± 0.31                  | (6.85 ± 0.39) x 10 <sup>3</sup>                  |
| MeGalA         | 5.31 ± 0.51                     | 28.8 ± 0.64                  | (4.85 ± 0.47) x 10 <sup>3</sup>                  |
| <i>p</i> NP-Ac | Cannot be saturated up to 10 mM |                              | (3.23 ± 0.063) x 10 <sup>1</sup>                 |

**Table S2.** Primers utilized for creation of *Ot*CE15A variants and for cloning of the GH30 xylanase from *Bacteroides ovatus* (*Bo*GH30).

| Gene                  | Primer                               | 5'-3' sequence                                                                                         |
|-----------------------|--------------------------------------|--------------------------------------------------------------------------------------------------------|
| <i>Ot</i> CE15A-S267A | S267A-f<br>S267A-r                   | GCATGCACGGCTCGGCAAG<br>GCCGTGCATGCCCGTGC                                                               |
| <i>Ot</i> CE15A-H408A | H408A-f<br>H408A-r                   | CCGGCCGGAATGACCGCGC<br>TCCGGCCGGCCCCGG                                                                 |
| <i>Ot</i> CE15A-E290A | E290A-f<br>E290A-r                   | TCGAACGCATCCGGTTGCGG<br>ACCGGATGCGTTCGAGATCACCAG                                                       |
| <i>Ot</i> CE15A-D356A | D356A-f<br>D356A-r                   | GAGGACGCTGATTGGGCGGATC<br>CCAATCAGCGTCTCGGCACTC                                                        |
| <i>Bo</i> GH30        | <i>Bo</i> GH30-f<br><i>Bo</i> GH30-r | CTTCCAGGGCCATAGTTGTTCGGGAGGGGAAGATGAAAAAAAAAG<br>TGGTGGTGTCTCGAGTCTAAAATGTCAATCTGACTGAAGTTATACTGTTAGCA |

**Table S3.** Crystallization conditions utilized for the respective datasets. Conditions were from, or optimized from, either Morpheus or JCSG+ screens (Molecular Dimensions) as described in the experimental procedures.

| <b>PDB ID</b> | <b>Protein-ligand</b>               | <b>Screen type</b> | <b>Condition</b>                                                                   |
|---------------|-------------------------------------|--------------------|------------------------------------------------------------------------------------|
| 6SYR          | <i>Ot</i> CE15A-Wt-GlcA             | Morpheus           | 0.1 M Carboxylic acids, 0.1 M Buffer System 3 pH 8.5, 37.5% v/v Precipitant Mix 4  |
| 6SZO          | <i>Ot</i> CE15A-S267A-GalA          | Morpheus           | 0.12 M Ethylene glycols, 0.1 M Buffer System 2 pH 7.5, 37.5% v/v Precipitant Mix 4 |
| 6SYV          | <i>Ot</i> CE15A-S267A-GlcA          | Morpheus           | 0.1 M Carboxylic acids, 0.1 M Buffer System 3 pH 8.5, 37.5% v/v Precipitant Mix 4  |
| 6TOI          | <i>Ot</i> CE15A-Wt-XUX              | Morpheus           | 0.06 M Divalents, 0.1 M Buffer System 1 pH 6.5, 37.5% v/v Precipitant Mix 4        |
| 6T0E          | <i>Ot</i> CE15A-Wt-BnzGlcA          | JCSG+              | 0.2 M TMAO, 0.1 M Tris pH 8.5, 20% w/v PEG 2000 MME                                |
| 6SYU          | <i>Ot</i> CE15A-Wt-Xylobiose        | Morpheus           | 0.09 M NPS, 0.1 M Buffer System 3 pH 8.5, 37.5% v/v Precipitant Mix 4              |
| 6SZ0          | <i>Ot</i> CE15A-H408A               | Morpheus           | 0.09 M NPS, 0.1 M Buffer System 3 pH 8.5, 37.5% v/v Precipitant Mix 4              |
| 6SZ4          | <i>Ot</i> CE15A-H408A-Acylated GlcA | JCSG+              | 0.2 M Ammonium formate, 20% w/v PEG 3350                                           |

**Table S4a:** Table of crystallographic statistics.

|                                                     | <i>Or</i> CE15A-Wt-GlcA    | <i>Or</i> CE15A-S267A-GlcA | <i>Or</i> CE15A-S267A-BnzGlcA                 | <i>Or</i> CE15A-S267A-GalA |
|-----------------------------------------------------|----------------------------|----------------------------|-----------------------------------------------|----------------------------|
| Data Collection                                     |                            |                            |                                               |                            |
| Date                                                | December 9, 2018           | October 6, 2018            | December 09, 2018                             | September 18, 2018         |
| Source                                              | ID30A-3 at ESRF            | ID23-2 at ESRF             | ID30A-3 at ESRF                               | P11 at Petra III           |
| Wavelength (Å)                                      | 0.9677                     | 0.8731                     | 0.9677                                        | 0.9891                     |
| Space group                                         | P1                         | P1                         | P2 <sub>1</sub> 2 <sub>1</sub> 2 <sub>1</sub> | P1                         |
| Cell dimensions                                     |                            |                            |                                               |                            |
| <i>a</i> , <i>b</i> , <i>c</i> (Å)                  | 43.22, 44.19, 50.17        | 43.51, 44.50, 50.37        | 51.72, 87.61, 173.91                          | 44.63, 46.14, 50.20        |
| $\alpha$ , $\beta$ , $\gamma$ (°)                   | 75.78, 65.42, 70.85        | 76.43, 66.96, 70.22        | 90, 90, 90                                    | 63.65, 86.79, 71.17        |
| No. of measured reflections                         | 177871 (18505)             | 334525 (15207)             | 865824 (79871)                                | 44355 (4349)               |
| No. of independent reflections                      | 47249 (4751)               | 102117 (4777)              | 63514 (5944)                                  | 16711 (1620)               |
| Resolution (Å)                                      | 32.39 - 1.49 (1.54 - 1.49) | 33.85 - 1.12 (1.16 - 1.12) | 44.45 - 1.89 (1.96 - 1.89)                    | 44.74 - 2.20 (2.28 - 2.20) |
| <i>R</i> <sub>merge</sub> (%)                       | 6.13 (141.6)               | 8.79 (104.4)               | 15.9 (223.1)                                  | 8.13 (48.0)                |
| CC <sub>1/2</sub> (%)                               | 99.9 (65.6)                | 99.5 (45.2)                | 99.9 (49.9)                                   | 99.9 (92.5)                |
| Mean I/ $\sigma$ I                                  | 9.88 (0.82)                | 6.12 (0.76)                | 12.3 (0.84)                                   | 8.66 (2.00)                |
| Completeness (%)                                    | 91.2 (91.4)                | 81.7 (38.3)                | 99.0 (92.0)                                   | 97.0 (94.6)                |
| Redundancy                                          | 3.8 (3.9)                  | 3.3 (3.2)                  | 13.6 (13.4)                                   | 2.7 (2.7)                  |
| Refinement                                          |                            |                            |                                               |                            |
| <i>R</i> <sub>work</sub> / <i>R</i> <sub>free</sub> | 0.183/0.223                | 0.162/0.182                | 0.162/0.215                                   | 0.154/0.221                |
| No. atoms                                           |                            |                            |                                               |                            |
| Protein                                             | 3128                       | 3247                       | 6176                                          | 2782                       |
| Ligand/ions                                         | 31                         | 99                         | 344                                           | 194                        |
| Water                                               | 227                        | 368                        | 413                                           | 122                        |
| B-factors                                           |                            |                            |                                               |                            |
| Protein                                             | 32.8                       | 17.5                       | 38.4                                          | 34.0                       |
| Ligand/ions                                         | 44.3                       | 32.3                       | 59.6                                          | 49.2                       |
| Water                                               | 39.7                       | 28.9                       | 43.2                                          | 38.6                       |
| RMSD                                                |                            |                            |                                               |                            |
| Bond length (Å)                                     | 0.008                      | 0.009                      | 0.011                                         | 0.013                      |
| Bond angles (°)                                     | 1.05                       | 1.18                       | 1.15                                          | 1.29                       |
| PDB accession                                       | 6SYR                       | 6SYV                       | 6T0E                                          | 6SZO                       |

**Table S4b:** Table of crystallographic statistics.

|                                                     | <i>Or</i> CE15A-Wt-XUX     | <i>Or</i> CE15A-Wt-Xylobiose | <i>Or</i> CE15A-H408A      | <i>Or</i> CE15A-H408A-Acylated GlcA |
|-----------------------------------------------------|----------------------------|------------------------------|----------------------------|-------------------------------------|
| Data Collection                                     |                            |                              |                            |                                     |
| Date                                                | December 9, 2018           | November 8, 2018             | May 29, 2019               | May 29, 2019                        |
| Source                                              | ID30A-3 at ESRF            | BioMAX at MAXIV              | P11 at Petra III           | P11 at Petra III                    |
| Wavelength (Å)                                      | 0.9677                     | 0.9184                       | 1.0332                     | 1.0332                              |
| Space group                                         | P1                         | P1                           | P1                         | P1                                  |
| Cell dimensions                                     |                            |                              |                            |                                     |
| <i>a</i> , <i>b</i> , <i>c</i> (Å)                  | 43.41, 44.17, 50.24        | 43.69, 44.34, 50.98          | 43.20, 44.20, 50.15        | 43.10, 44.15, 50.18                 |
| $\alpha$ , $\beta$ , $\gamma$ (°)                   | 75.80, 65.49, 70.98        | 77.24, 67.27, 70.58          | 76.31, 65.70, 70.74        | 76.10, 66.23, 70.85                 |
| No. of measured reflections                         | 158242 (12708)             | 203469 (3194)                | 105565 (8389)              | 104962 (9590)                       |
| No. of independent reflections                      | 42565 (3634)               | 57996 (1682)                 | 30758 (2499)               | 30662 (2844)                        |
| Resolution (Å)                                      | 32.49 - 1.54 (1.59 - 1.54) | 41.58 - 1.33 (1.38 - 1.33)   | 45.39 - 1.74 (1.80 - 1.74) | 45.56 - 1.75 (1.81 - 1.75)          |
| <i>R</i> <sub>merge</sub> (%)                       | 4.43 (133)                 | 4.83 (16.6)                  | 4.63 (33.8)                | 9.83 (82.9)                         |
| CC <sub>1/2</sub>                                   | 99.9 (50.8)                | 99.8 (94.2)                  | 99.8 (94.5)                | 99.4 (73.6)                         |
| Mean <i>I</i> / $\sigma$ <i>I</i>                   | 15.4 (0.72)                | 15.4 (3.40)                  | 14.6 (2.85)                | 6.62 (1.53)                         |
| Completeness                                        | 88.6 (67.6)                | 77.0 (22.3)                  | 94.2 (76.8)                | 95.5 (88.7)                         |
| Redundancy                                          | 3.7 (3.5)                  | 3.5 (1.9)                    | 3.4 (3.4)                  | 3.4 (3.4)                           |
| Refinement                                          |                            |                              |                            |                                     |
| <i>R</i> <sub>work</sub> / <i>R</i> <sub>free</sub> | 0.160/0.195                | 0.120/0.145                  | 0.142/0.192                | 0.214/ 0.284                        |
| No. atoms                                           |                            |                              |                            |                                     |
| Protein                                             | 3109                       | 3248                         | 3138                       | 3091                                |
| Ligand/ions                                         | 114                        | 72                           | 35                         | 15                                  |
| Water                                               | 258                        | 626                          | 223                        | 109                                 |
| B-factors                                           |                            |                              |                            |                                     |
| Protein                                             | 29.2                       | 12.4                         | 31.4                       | 38.4                                |
| Ligand/ions                                         | 44.6                       | 27.7                         | 49.3                       | 36.1                                |
| Water                                               | 37.3                       | 26.8                         | 38.8                       | 38.3                                |
| RMSD                                                |                            |                              |                            |                                     |
| Bond length (Å)                                     | 0.010                      | 0.008                        | 0.009                      | 0.012                               |
| Bond angles (°)                                     | 1.14                       | 1.02                         | 1.01                       | 1.18                                |
| PDB accession                                       | 6TOI                       | 6SYU                         | 6SZ0                       | 6SZ4                                |

|         |     |   |   |   |   |   |   |   | $k_{cat}/K_m$<br>( $s^{-1}M^{-1}$ )<br>MeGlcA | $k_{cat}/K_m$<br>( $s^{-1}M^{-1}$ )<br>MeGalA |   |   |   |   |   |   |   |   |   |     |          |          |
|---------|-----|---|---|---|---|---|---|---|-----------------------------------------------|-----------------------------------------------|---|---|---|---|---|---|---|---|---|-----|----------|----------|
| OtCE15A | ... | A | V | H | G | H | S | R | L                                             | G                                             | K | A | A | L | W | A | G | A | Q | ... | 6.85E+03 | 4.85E+03 |
| OtCE15C | ... | A | I | V | G | V | S | R | L                                             | G                                             | K | T | V | L | W | A | G | A | S | ... | 8.98E+02 | 1.19E+03 |
| SuCE15A | ... | A | V | T | G | V | S | R | L                                             | G                                             | K | T | V | M | W | A | G | A | H | ... | 2.32E+03 | 1.62E+03 |
| SuCE15C | ... | G | L | I | G | H | S | R | L                                             | G                                             | K | A | A | I | W | A | G | A | Q | ... | 1.66E+04 | 1.59E+03 |
| SlCE15A | ... | I | S | I | G | H | S | R | I                                             | G                                             | K | A | A | V | W | A | G | A | Q | ... | 1.55E+03 | 3.82E+01 |
| TtCE15A | ... | A | V | T | G | C | S | R | F                                             | G                                             | K | G | A | F | I | A | G | A | F | ... | 1.03E+03 | 1.20E+01 |
| OtCE15D | ... | G | V | E | G | H | S | R | Y                                             | G                                             | K | T | A | L | V | A | A | A | Y | ... | 5.19E+02 | 1.95E-06 |
| SlCE15B | ... | G | I | Q | G | H | S | R | W                                             | G                                             | K | T | A | L | L | A | G | A | L | ... | 4.57E+02 | 3.66E-07 |
| SlCE15C | ... | G | V | E | G | V | S | R | Y                                             | G                                             | K | A | A | L | V | A | M | A | F | ... | 1.03E+02 | 3.73E-06 |
| SuCE15B | ... | G | I | E | G | V | S | R | Y                                             | G                                             | K | A | A | L | V | T | M | A | F | ... | 6.00E-02 | 9.00E-03 |

**Figure S1.** Correlation of a leucine residue and MeGalA activity in CE15 members. Excerpt of a multiple sequence alignment with select CE15 members from *Opitutus terrae* (Ot), *Solibacter usitatus* (Su), *Spirosoma linguale* (Sl), and *Teredinibacter turnerae* (Tt) shown together with their activities on MeGlcA and MeGalA. Amino acid numbering corresponds to the OtCE15A enzyme, and the catalytic Ser residue is marked with a cyan asterisk. The leucine residue and high activity on a substrate is highlighted in green. Intermediately sized residues and reduced activity if highlighted yellow. Other residues found at the equivalent position and their associated diminished activity values are highlighted in magenta. The activity measurements are from previously determined results (1).

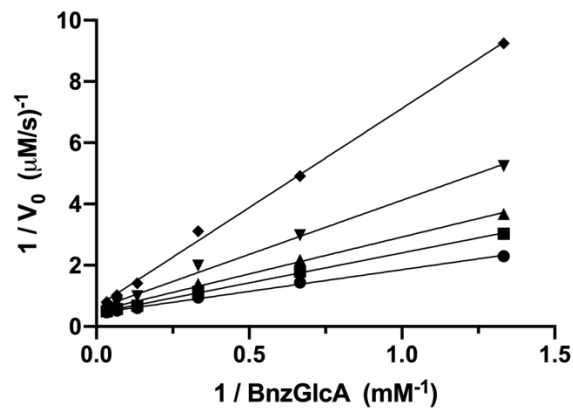

**Figure S2.** Lineweaver-Burk plot of xylose inhibition on the OtCE15A BnzGlcA esterase reaction. Kinetic assays were completed with xylose concentrations of either 0 mM (●), 30 mM (■), 60mM (▲), 125 mM (▼), or 250 mM (◆). The kinetic data was fitted in GraphPad Prism 8 to the competitive inhibition equation.

## References

1. Arning Bååth, J., Mazurkewich, S., Knudsen, R. M., Poulsen, J. N., Olsson, L., Lo Leggio, L., and Larsbrink, J. (2018) Biochemical and structural features of diverse bacterial glucuronoyl esterases facilitating recalcitrant biomass conversion. *Biotechnol Biofuels* **11**, 213
